# Supplementary material for: Scanning Photocurrent Microscopy in Single Crystal Multidimensional Hybrid Lead Bromide Perovskites
Source: MDPI journal article supplement (doi:10.3390/nano13182570), 2023-09-16
Supplement: s1 [file s1]

## Supplementary information

# Scanning Photocurrent Microscopy in Single Crystal Multidimensional Hybrid Lead Bromide Perovskites

Elena Segura-Sanchis, Rocío García-Aboal, Roberto Fenollosa, Fernando Ramiro-Manzano \* and Pedro Atienzar \*

Instituto de Tecnología Química, Consejo Superior de Investigaciones Científicas, Universitat Politècnica de València, Avenida de los Naranjos s/n, 46022 Valencia, Spain; elsesan@itq.upv.es (E.S.-S.); rociogarciaaboal@gmail.com (R.G.-A.); rfenollo@ter.upv.es (R.F.)

\* Correspondence: ferraman@fis.upv.es (F.R.-M.); pedatcor@itq.upv.es (P.A.)

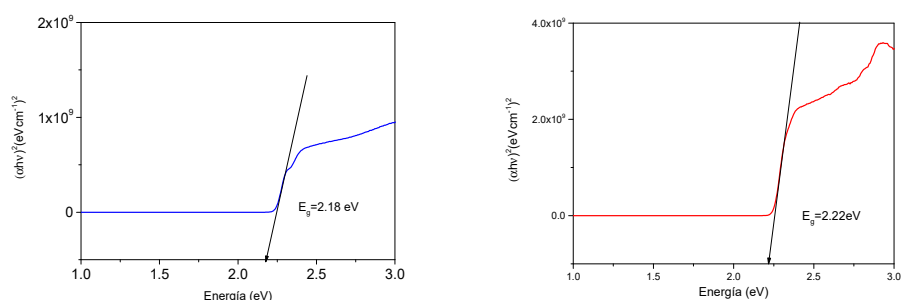

**Figure S1.** Tauc plot of  $(\alpha h\nu)^{0.5}$  vs. photon energy (hu) for the 3D perovskite (left) and 2D-3D (right). The optical band gap of semiconductor can be estimated from the intercept of the extrapolated linear fit for the plotted experimental data of  $(\alpha h\nu)^n$  versus incident photon energy ( $h\nu$ ) near the absorption edge.

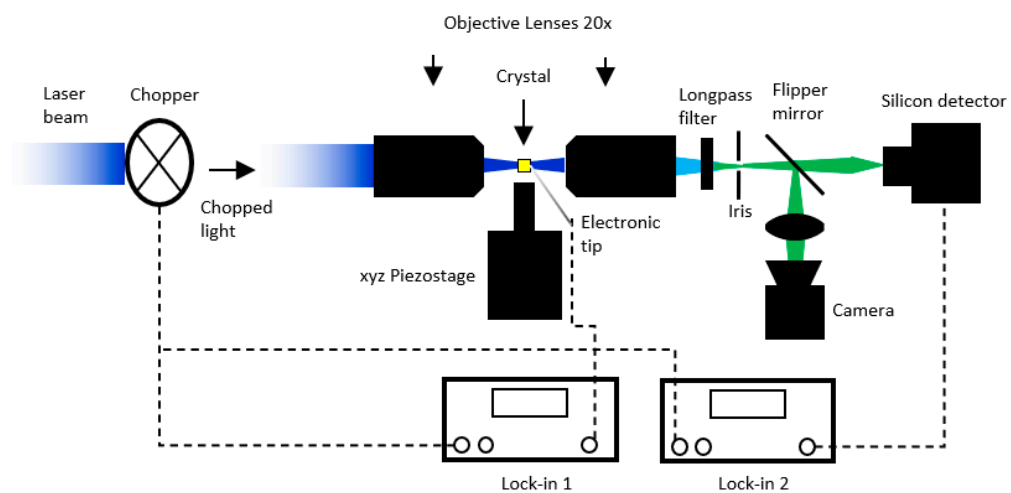

**Figure S2.** Schematic representation of the homemade SPCM used.

A)

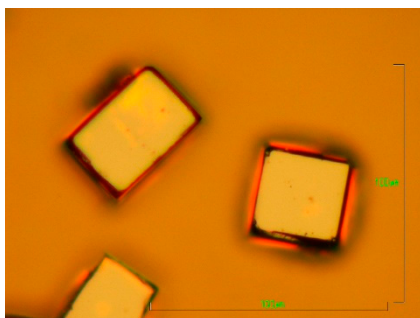

B)

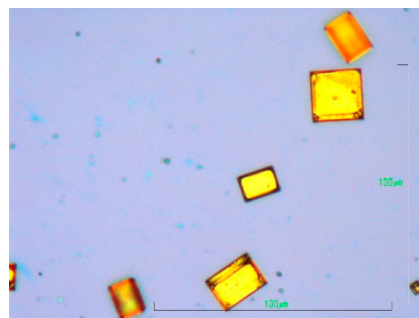

**Figure S3.** Optical microscope images of single crystals of 3D (A) and 2D-3D multidimensional perovskites (B) deposited on top of a conductive indium tin oxide substrate (ITO).

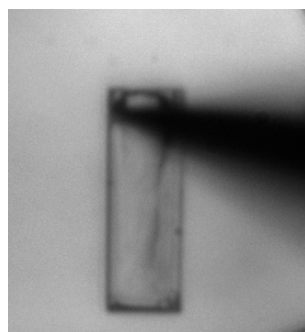

**Figure S4.** Optical microscopy image showing a single crystal on a conductive substrate, with the electronic tip making contact on the top surface.

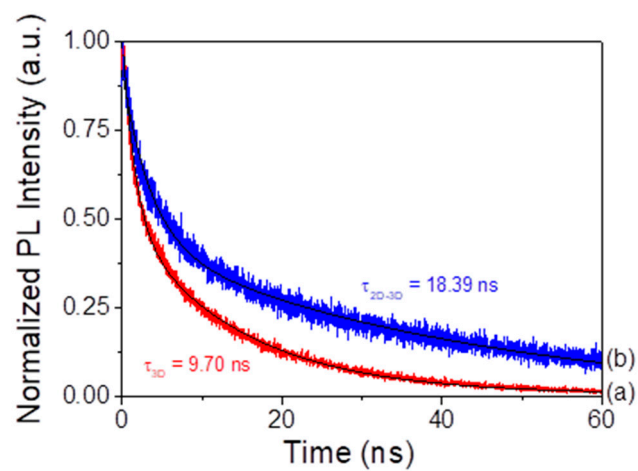

**Figure S5.** PL decays lifetime of single crystals of 3D (a) and 2D-3D multidimensional perovskites (b) measured at 545 and 535 nm respectively.

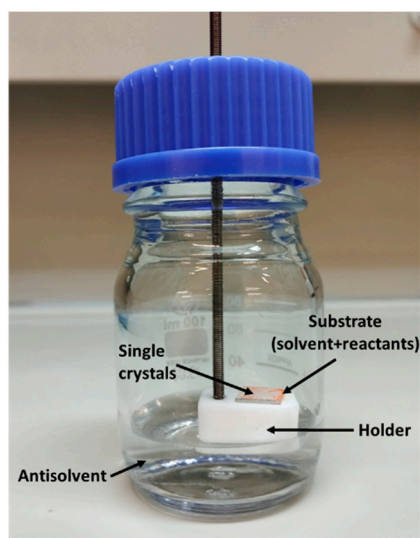

**Figure S6.** Photography of the antisolvent system used for the growth of the single crystals.
